# Supplementary material for: Genetic Disruption of 21-Hydroxylase in Zebrafish Causes Interrenal Hyperplasia
Source: Oxford University Press journal article supplement (doi:10.1210/en.2017-00549), 2017-09-13
Supplement: en.2017-00549_suppl_supplemental_figure_1.pdf [file en.2017-00549_suppl_supplemental_figure_1.pdf]

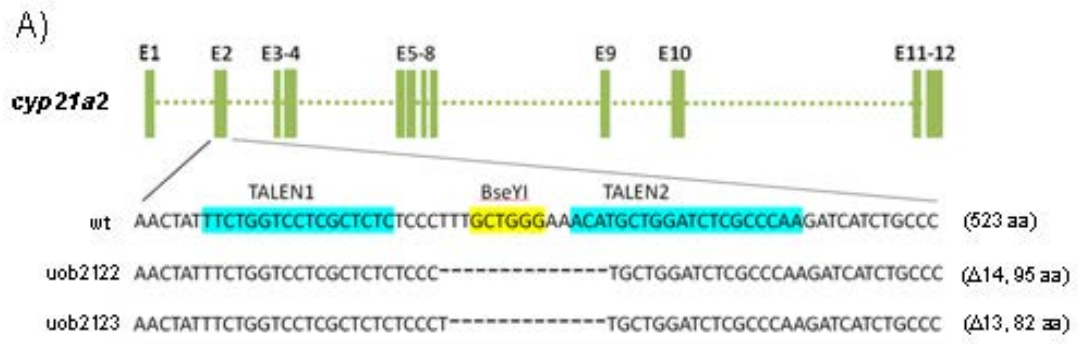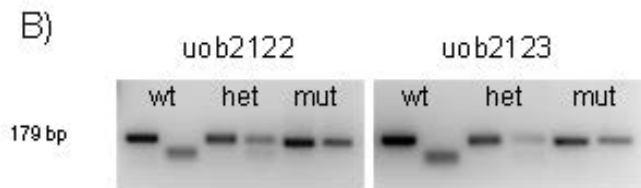

**Supplementary Figure 1**

1  
2  
3

A)

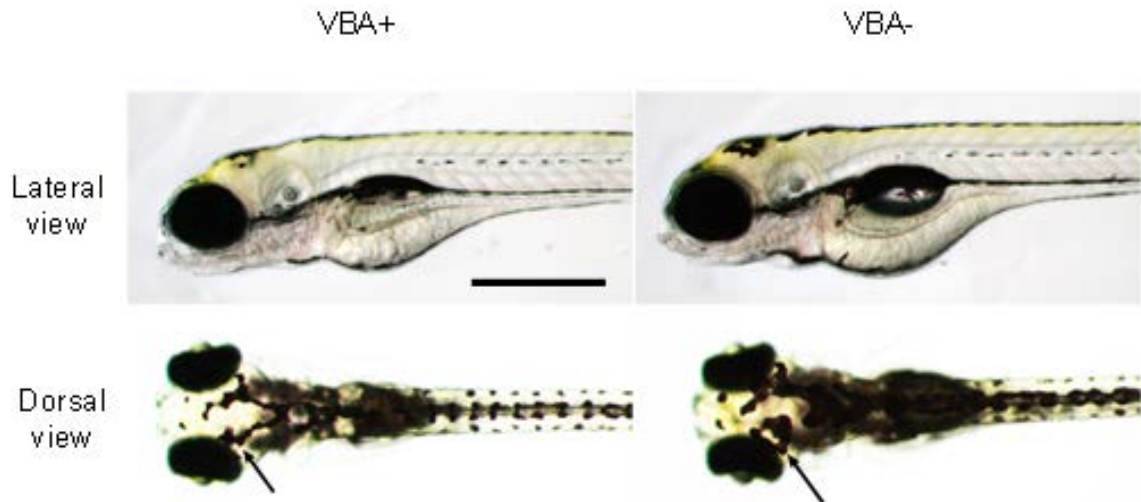

B)

| Genotype phenotype correlation of Visual Background Adaption (VBA) phenotype |                 |                     |                   |
|------------------------------------------------------------------------------|-----------------|---------------------|-------------------|
| <b>Line 2 (uob2122)</b>                                                      | <i>Genotype</i> |                     |                   |
| <i>Phenotype</i>                                                             | Wild type       | Heterozygous mutant | Homozygous mutant |
| VBA+ pale (n = 29)                                                           | 4               | <b>25</b>           | 0                 |
| VBA- dark (n = 48)                                                           | 0               | 5                   | <b>43</b>         |
| <b>Line 3 (uob2123)</b>                                                      | <i>Genotype</i> |                     |                   |
| <i>Phenotype</i>                                                             | Wild type       | Heterozygous mutant | Homozygous mutant |
| VBA+ pale (n = 9)                                                            | 4               | 5                   | 0                 |
| VBA- dark (n = 10)                                                           | 0               | 0                   | <b>10</b>         |

4

5

6

7

## Supplementary Figure 2

8

**A)**

Wild type

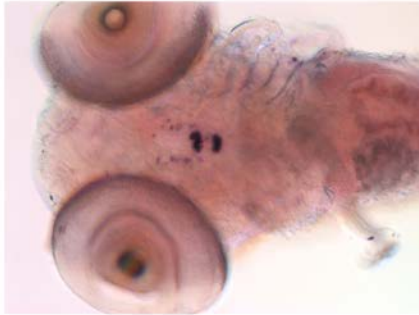

**B)** Homozygous mutant

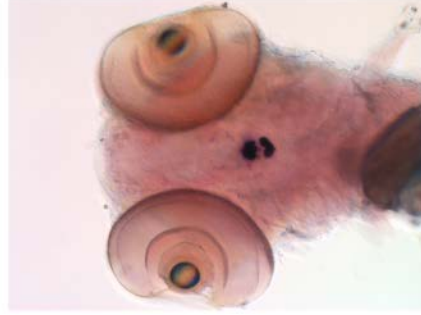

9

10

11

### Supplementary Figure 3

12
