# Supplementary material for: Genetic Disruption of 21-Hydroxylase in Zebrafish Causes Interrenal Hyperplasia
Source: Oxford University Press journal article supplement (doi:10.1210/en.2017-00549), 2017-09-13
Supplement: en.2017-00549_suppl_supplemental_figure_legends.doc [file en.2017-00549_suppl_supplemental_figure_legends.doc]

**Supplementary Figure 1 Generation of *cyp21a2* mutant alleles**

A) Strategy for the generation of *cyp21a2* mutant alleles by TALEN-mediated mutagenesis. A pair of TALENs was used to target a 15 bp spacer sequence within exon2 of the *cyp21a2* gene. The targeted sequence contained a BseYI restriction site, which was utilised to assess the activity of the TALENs, and for genotyping by a diagnostic BseYI restriction digest. The sequences of the respective mutant alleles, uob2122/uob2123, are shown. Deleted nucleotides are indicated by “–”. The identified deletions are predicted to cause frame shifts, leading to premature stop codons and truncated mutant proteins. The numbers of deleted base pairs and the numbers of amino acids of the predicted mutant proteins are given in brackets behind the sequences. B) Genotyping of individual *cyp21a2uob2122* and *cyp21A2uob2123* embryos by PCR and diagnostic digest with BseYI. Representative results for BseYI restriction digests of *cyp21a2* exon2 PCR products amplified from genomic DNA isolated from wild type (wt), heterozygous (het) and homozygous mutant (mut) embryos. For each genotype, gel images show undigested to the left and digested PCR product to the right (gel image inversed). The 179 bp PCR amplicon is cut into two fragments of 103 and 76 bp in wild types, while mutant alleles are resistant to digest with BseYI.

**Supplementary Figure 2 Zebrafish *cyp21a2* mutants have an impaired Visual Background Adaption (VBA) phenotype**

A) Lateral (upper panel) and dorsal (lower panel) view images of 120 hpf larvae from a *cyp21a2uob2122/+* in-cross. Overall morphology is comparable, but, unlike VBA+ larvae, VBA- larvae fail to aggregate the melanosomes in their melanophores when exposed to bright light; compare melanophores (arrows) between VBA+ and VBA- larva. Scale bar: 0.5 mm. B) Genotyping of *cyp21a2uob2122* and *cyp21a2uob2123* larvae after VBA assay. The VBA+ larvae are always wild types or heterozygotes. The VBA- larvae are almost always homozygous mutants.

**Supplementary Figure 3 Zebrafish *cyp21a2* mutants have an enlarged pituitary gland**

*In situ* hybridisation for *pomca* reveals a larger field of expression in the anterior and posterior pituitary of *cyp21a2uob2122* homozygous mutant larvae at 120 hpf. Ventral whole-mount view.
