# Supplementary material for: Genetic Disruption of 21-Hydroxylase in Zebrafish Causes Interrenal Hyperplasia
Source: Oxford University Press journal article supplement (doi:10.1210/en.2017-00549), 2017-09-13
Supplement: en.2017-00549_suppl_supplemental_table_1.pdf [file en.2017-00549_suppl_supplemental_table_1.pdf]

| Species     | Identifier                          | TILAPIA | ZEBRAFISH | CAVE_FISH | EEL   | PUFFERFISH | PLATYFISH | MEDAKA | STICKLEBACK | GROUSE | CHICKEN | GOLDEN | RAT   | MOUSE | GUINEA | COW   | PIG   | DOLPHIN | CAT   | LYNX  | DOG   | WOLF  | PANDA | RABBIT | HUMAN | GORILLA | CHIMPANZEE | ORANG_UTAN |
|-------------|-------------------------------------|---------|-----------|-----------|-------|------------|-----------|--------|-------------|--------|---------|--------|-------|-------|--------|-------|-------|---------|-------|-------|-------|-------|-------|--------|-------|---------|------------|------------|
| TILAPIA     | TILAPIA_tr[I3J3V0]                  | 100     | 57.34     | 59.45     | 61.11 | 67.51      | 72.26     | 75.41  | 71.93       | 36.67  | 36.13   | 36.92  | 33.58 | 34.85 | 34.34  | 35    | 35.25 | 35.24   | 34.34 | 34.09 | 33.83 | 33.83 | 33.83 | 34.58  | 35.66 | 35.57   | 35.82      | 36.07      |
| ZEBRAFISH   | ZEBRAFISH_tr[H0WEK6]                | 57.34   | 100       | 70.52     | 68.34 | 66.6       | 65.69     | 71.65  | 66.09       | 37.83  | 40.8    | 41.42  | 39.12 | 39.37 | 38.57  | 39.67 | 39.96 | 38.88   | 39.62 | 39.41 | 39.2  | 39.2  | 39.24 | 39.58  | 40.71 | 41.25   | 40.83      | 40.62      |
| CAVE_FISH   | CAVE_FISH_tr[W5LAA4]                | 59.45   | 70.52     | 100       | 68.79 | 65.18      | 66.8      | 73.99  | 68.15       | 37.68  | 41.03   | 41.51  | 37.21 | 38.51 | 38.56  | 38.82 | 38.69 | 38.66   | 39.41 | 38.98 | 39.41 | 39.41 | 38.59 | 39.16  | 39.24 | 39.58   | 39.79      | 39.79      |
| EEL         | JAPANESE_EEL_tr[Q7ZZR9]             | 61.11   | 68.34     | 68.79     | 100   | 67.31      | 68.22     | 74.39  | 70.58       | 39.1   | 42.43   | 42.92  | 38.43 | 41.03 | 41.28  | 41.1  | 40.34 | 40.72   | 40.21 | 40    | 40.85 | 40.85 | 40.26 | 40.59  | 41.74 | 41.65   | 41.65      | 41.86      |
| PUFFERFISH  | SPOTTED_GREEN_PUFFERFISH_tr[H3DM74] | 67.51   | 66.6      | 65.18     | 67.31 | 100        | 74.71     | 80.22  | 77.22       | 38.24  | 41.24   | 41.72  | 38.9  | 39.79 | 40.04  | 40.3  | 40.17 | 40.34   | 39.62 | 39.62 | 40.68 | 40.68 | 40.09 | 40.42  | 41.14 | 41.26   | 41.47      | 41.47      |
| PLATYFISH   | SOUTHERN_PLATYFISH_tr[M4AKU8]       | 72.26   | 65.69     | 66.8      | 68.22 | 74.71      | 100       | 84.3   | 77.95       | 38.57  | 40.43   | 41.13  | 38.46 | 40.43 | 39.61  | 40.09 | 39.74 | 40.13   | 38.97 | 38.76 | 39.19 | 39.19 | 39.66 | 39.57  | 40.51 | 40.43   | 40.85      | 40.64      |
| MEDAKA      | MEDAKA_tr[H2LRG4]                   | 5.41    | 71.65     | 73.99     | 74.39 | 80.22      | 84.3      | 100    | 83.52       | 40.97  | 43.64   | 43.94  | 39.5  | 42.11 | 41.59  | 41.04 | 40.68 | 41.5    | 41.36 | 41.14 | 41.36 | 41.36 | 40.73 | 40.5   | 41.4  | 41.4    | 41.4       | 41.4       |
| STICKLEBACK | STICKLEBACK_PTHR24281               | 71.93   | 66.09     | 68.15     | 70.58 | 77.22      | 77.95     | 83.52  | 100         | 38.15  | 40.94   | 41.2   | 38.56 | 40.51 | 40.98  | 40.59 | 40.25 | 39.58   | 39.7  | 39.49 | 39.7  | 39.7  | 39.53 | 40.72  | 41.23 | 41.14   | 41.35      | 40.93      |
| GROUSE      | BLACK_GROUSE_tr[I6PDD1]             | 36.67   | 37.83     | 37.68     | 39.1  | 38.24      | 38.57     | 40.97  | 38.15       | 100    | 88.29   | 90.4   | 38.7  | 40.19 | 41.53  | 41.9  | 41.67 | 43.74   | 43.44 | 42.96 | 43.2  | 43.2  | 43.68 | 40.76  | 41.09 | 40.76   | 41         | 41         |
| CHICKEN     | CHICKEN_tr[A5HUM5]                  | 36.13   | 40.8      | 41.03     | 42.43 | 41.24      | 40.43     | 43.64  | 40.94       | 88.29  | 100     | 94.9   | 41.76 | 43.32 | 45.63  | 45.22 | 44.68 | 46.09   | 46.27 | 45.63 | 45.63 | 45.63 | 46.14 | 44.28  | 44.16 | 43.86   | 44.07      | 43.86      |
| GOLDEN      | GOLDEN_PHEASANT_tr[I6YHU5]          | 36.92   | 41.42     | 41.51     | 42.92 | 41.72      | 41.13     | 43.94  | 41.2        | 90.4   | 94.9    | 100    | 42.61 | 44.42 | 46.97  | 46.55 | 46    | 47.64   | 47.4  | 46.75 | 46.75 | 46.75 | 47.49 | 45.16  | 45.26 | 44.95   | 45.16      | 44.95      |
| RAT         | RAT_sp[Q64562]                      | 33.58   | 39.12     | 37.21     | 38.43 | 38.9       | 38.46     | 39.5   | 38.56       | 38.7   | 41.76   | 42.61  | 100   | 87.27 | 67.42  | 70.14 | 70.72 | 72.34   | 70.1  | 69.9  | 68.66 | 68.66 | 70.54 | 72.07  | 69.75 | 69.2    | 69.4       | 69.4       |
| MOUSE       | MOUSE_sp[P03940]                    | 34.85   | 39.37     | 38.51     | 41.03 | 39.79      | 40.43     | 42.11  | 40.51       | 40.19  | 43.32   | 44.42  | 87.27 | 100   | 68.88  | 71.9  | 73.44 | 74.43   | 73.44 | 73.65 | 72.2  | 72.2  | 73.28 | 72.31  | 71.84 | 71.28   | 71.49      | 71.49      |
| GUINEA      | GUINEA_PIG                          | 34.34   | 38.57     | 38.56     | 41.28 | 40.04      | 39.61     | 41.59  | 40.98       | 41.53  | 45.63   | 46.97  | 67.42 | 68.88 | 100    | 72.76 | 71.89 | 72.1    | 72.56 | 72.97 | 71.54 | 71.54 | 72.6  | 74.19  | 75.2  | 74.19   | 74.59      | 74.8       |
| COW         | COW_sp[P00191]                      | 35      | 39.67     | 38.82     | 41.1  | 40.3       | 40.09     | 41.04  | 40.59       | 41.9   | 45.22   | 46.55  | 70.14 | 71.9  | 72.76  | 100   | 87.8  | 88.41   | 81.91 | 82.11 | 81.91 | 81.91 | 84.87 | 78.7   | 78.66 | 79.11   | 79.31      | 79.92      |
| PIG         | PIG_sp[P15540]                      | 35.25   | 39.96     | 38.69     | 40.34 | 40.17      | 39.74     | 40.68  | 40.25       | 41.67  | 44.68   | 46     | 70.72 | 73.44 | 71.89  | 87.8  | 100   | 89      | 83.1  | 82.48 | 81.87 | 81.87 | 83.61 | 78.66  | 79.63 | 79.88   | 80.08      | 80.49      |
| DOLPHIN     | DOLPHIN_PTHR24281                   | 35.24   | 38.88     | 38.66     | 40.72 | 40.34      | 40.13     | 41.5   | 39.58       | 43.74  | 46.09   | 47.64  | 72.34 | 74.43 | 72.1   | 88.41 | 89    | 100     | 83.1  | 82.48 | 82.48 | 82.48 | 84.63 | 78.14  | 79.51 | 79.15   | 79.55      | 79.96      |
| CAT         | CAT_sp[Q2LA60]                      | 34.34   | 39.62     | 39.41     | 40.21 | 39.62      | 38.97     | 41.36  | 39.7        | 43.44  | 46.27   | 47.4   | 70.1  | 73.44 | 72.56  | 81.91 | 83.1  | 83.1    | 100   | 98.58 | 85.37 | 85.37 | 87.53 | 78.05  | 79.47 | 79.07   | 79.27      | 79.47      |
| LYNX        | LYNX_sp[Q2LA59]                     | 34.09   | 39.41     | 38.98     | 40    | 39.62      | 38.76     | 41.14  | 39.49       | 42.96  | 45.63   | 46.75  | 69.9  | 73.65 | 72.97  | 82.11 | 82.48 | 82.48   | 98.58 | 100   | 86.18 | 86.18 | 87.93 | 78.66  | 79.47 | 79.07   | 79.27      | 79.27      |
| DOG         | DOG_sp[Q8WNNW0]                     | 33.83   | 39.2      | 39.41     | 40.85 | 40.68      | 39.19     | 41.36  | 39.7        | 43.2   | 45.63   | 46.75  | 68.66 | 72.2  | 71.54  | 81.91 | 81.87 | 82.48   | 85.37 | 86.18 | 100   | 100   | 89.16 | 77.64  | 78.25 | 77.85   | 77.85      | 77.85      |
| WOLF        | WOLF_sp[Q2LCM1]                     | 33.83   | 39.2      | 39.41     | 40.85 | 40.68      | 39.19     | 41.36  | 39.7        | 43.2   | 45.63   | 46.75  | 68.66 | 72.2  | 71.54  | 81.91 | 81.87 | 82.48   | 85.37 | 86.18 | 100   | 100   | 89.16 | 77.64  | 78.25 | 77.85   | 77.85      | 77.85      |
| PANDA       | PANDA_tr[G1L6B8]                    | 33.83   | 39.24     | 38.59     | 40.26 | 40.09      | 39.66     | 40.73  | 39.53       | 43.68  | 46.14   | 47.49  | 70.54 | 73.28 | 72.6   | 84.87 | 83.61 | 84.63   | 87.53 | 87.93 | 89.16 | 89.16 | 100   | 78.53  | 78.73 | 77.91   | 78.32      | 78.53      |
| RABBIT      | RABBIT_tr[G1SS94]                   | 34.58   | 39.58     | 39.16     | 40.59 | 40.42      | 39.57     | 40.5   | 40.72       | 40.76  | 44.28   | 45.16  | 72.07 | 72.31 | 74.19  | 78.7  | 78.66 | 78.14   | 78.05 | 78.66 | 77.64 | 77.64 | 78.53 | 100    | 78.54 | 78.38   | 79.19      | 79.39      |
| HUMAN       | HUMAN_sp[P08686]                    | 35.66   | 40.71     | 39.24     | 41.74 | 41.14      | 40.51     | 41.4   | 41.23       | 41.09  | 44.16   | 45.26  | 69.75 | 71.84 | 75.2   | 78.66 | 79.63 | 79.51   | 79.47 | 79.47 | 78.25 | 78.25 | 78.73 | 78.54  | 100   | 97.77   | 98.58      | 97.57      |
| GORILLA     | GORILLA_tr[G3RB24]                  | 35.57   | 41.25     | 39.58     | 41.65 | 41.26      | 40.43     | 41.4   | 41.14       | 40.76  | 43.86   | 44.95  | 69.2  | 71.28 | 74.19  | 79.11 | 79.88 | 79.15   | 79.07 | 79.07 | 77.85 | 77.85 | 77.91 | 78.38  | 97.77 | 100     | 98.59      | 97.58      |
| CHIMPANZEE  | CHIMPANZEE_tr[H2R119]               | 35.82   | 40.83     | 39.79     | 41.65 | 41.47      | 40.85     | 41.4   | 41.35       | 41     | 44.07   | 45.16  | 69.4  | 71.49 | 74.59  | 79.31 | 80.08 | 79.55   | 79.27 | 79.27 | 77.85 | 77.85 | 78.32 | 79.19  | 98.58 | 98.59   | 100        | 98.59      |
| ORANG_UTAN  | ORANG_UTAN_tr[H2PIM4]               | 36.07   | 40.62     | 39.79     | 41.86 | 41.47      | 40.64     | 41.4   | 40.93       | 41     | 43.86   | 44.95  | 69.4  | 71.49 | 74.8   | 79.92 | 80.49 | 79.96   | 79.47 | 79.27 | 77.85 | 77.85 | 78.53 | 79.39  | 97.57 | 97.58   | 98.59      | 100        |
